# Supplementary material
Source: HighWire-hosted journal article supplement (https://gut.bmj.com/content/gutjnl-2022-326928)
Supplement: inline-supplementary-material-2 [file inline-supplementary-material-2.pdf]

## Supplemental Figures

# Methionine Deficiency Facilitates Antitumor Immunity by Altering m<sup>6</sup>A Methylation of Immune Checkpoint Transcripts

Ting Li, Yue-Tao Tan, Yanxing Chen, Xiao-Jun Zheng, Wen Wang, Kun Liao, Hai-Yu Mo, Junzhong Lin, Wei Yang, Hai-Long Piao, Rui-Hua Xu, Huai-Qiang Ju

Figure S1

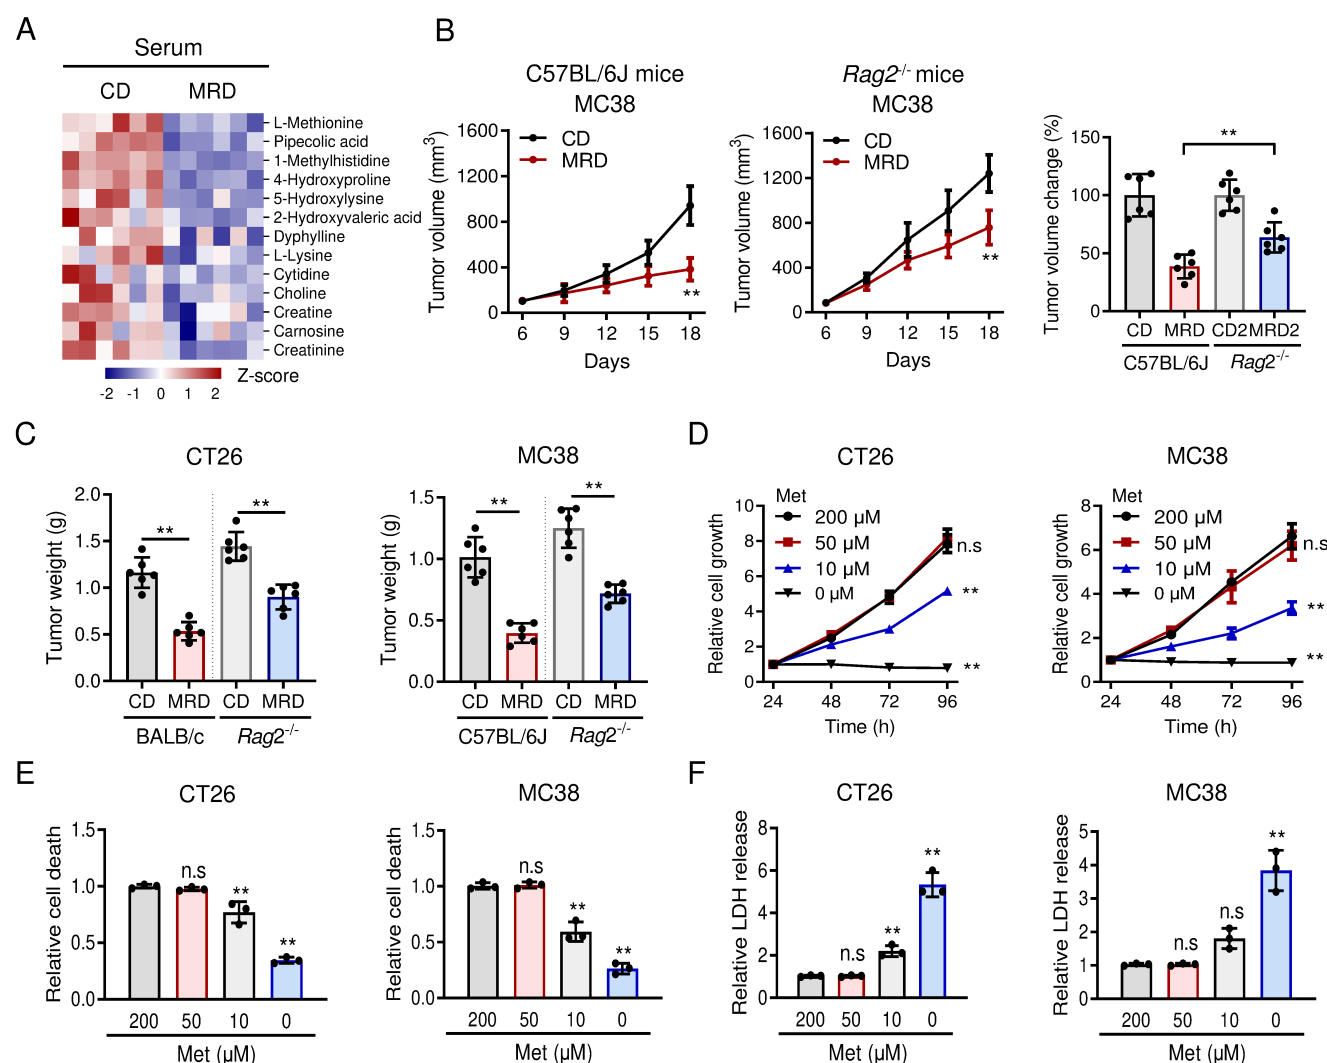

**Figure S1. Methionine restriction suppressed tumor growth, related to Figure 1. (A)** Heat map of changed metabolites in the serum of BALB/c mice and *Rag2*<sup>-/-</sup> mice implanted with CT26 cells and subjected to CD or MRD feeding. (n = 3 mice per group). **(B)** Subcutaneous tumor models established in C57BL/6J mice and *Rag2*<sup>-/-</sup> mice showing the tumor growth rate and growth rate change after implantation of MC38 cells with CD or MRD feeding. (n = 6 mice per group). **(C)** Subcutaneous tumor weight after implantation of CT26 (left) or MC38 (right) cells with CD or MRD feeding. (n = 6 mice per group). **(D-F)** MTS assays of the cell proliferation rate (D), flow cytometric analysis of cell death (E) and LDH assays of LDH release (F) of CRC cells with methionine-restricted or control medium treatment. The data in B-F are presented as the means ± SDs. *P* values were determined by two-way ANOVA (Tumor volume in **B** and **D**), one-way ANOVA (Tumor volume change in **B**, **E** and **F**) and two-tailed unpaired Student's *t* test (**C**). \*\**P* < 0.01; n.s, not significant.

Figure S2

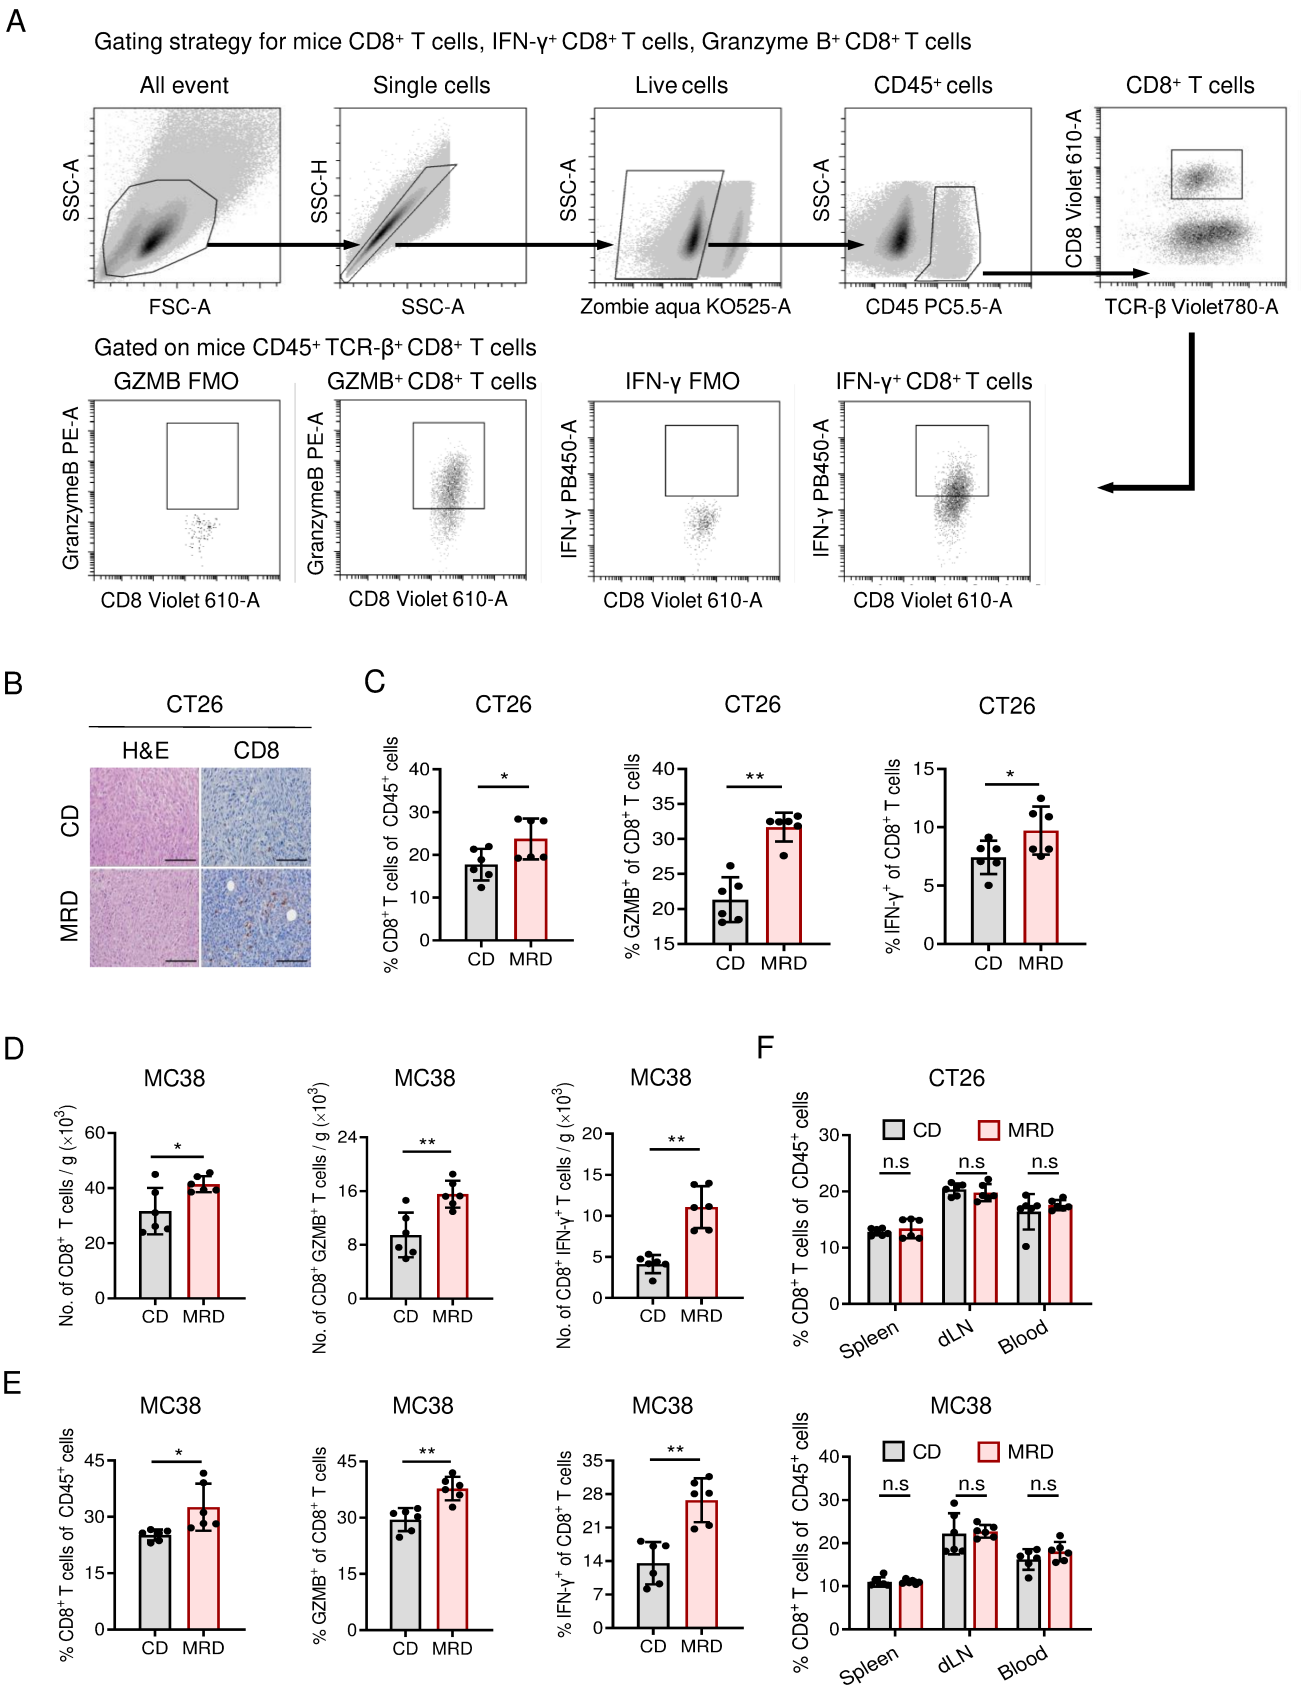

## Figure S2

### Figure S2. Methionine is critical for antitumor immunity via CD8<sup>+</sup> T cells, related to Figure 1.

**(A)** Gating strategy for flow cytometric analysis. **(B)** Representative images of H&E and CD8 staining in subcutaneous tumor model mice implanted with CT26 cells and subjected to CD or MRD feeding (scale bar: 100  $\mu$ m). **(C)** Flow cytometric analysis of the proportions of CD8<sup>+</sup> T cells, CD8<sup>+</sup> GZMB<sup>+</sup> T cells and CD8<sup>+</sup> IFN- $\gamma$ <sup>+</sup> T cells in subcutaneous tumor model mice implanted with CT26 cells and subjected to CD or MRD feeding. (n = 6 mice per group). **(D-E)** Flow cytometric analysis of the number (D) and proportions (E) of CD8<sup>+</sup> T cells, CD8<sup>+</sup> GZMB<sup>+</sup> T cells and CD8<sup>+</sup> IFN- $\gamma$ <sup>+</sup> T cells in subcutaneous tumor model mice implanted with MC38 cells and subjected to CD or MRD feeding. (n = 6 mice per group). **(F)** Flow cytometric analysis of the proportions of CD8<sup>+</sup> T cells in spleen, draining lymph nodes (dLN) and blood in subcutaneous tumor model mice implanted with CRC cells and subjected to CD or MRD feeding. (n = 6 mice per group). The data in C-F are presented as the means  $\pm$  SDs. *P* values were determined by two-tailed unpaired Student's *t* test (**C-F**). \**P* < 0.05; \*\**P* < 0.01; n.s, not significant.

## Figure S3

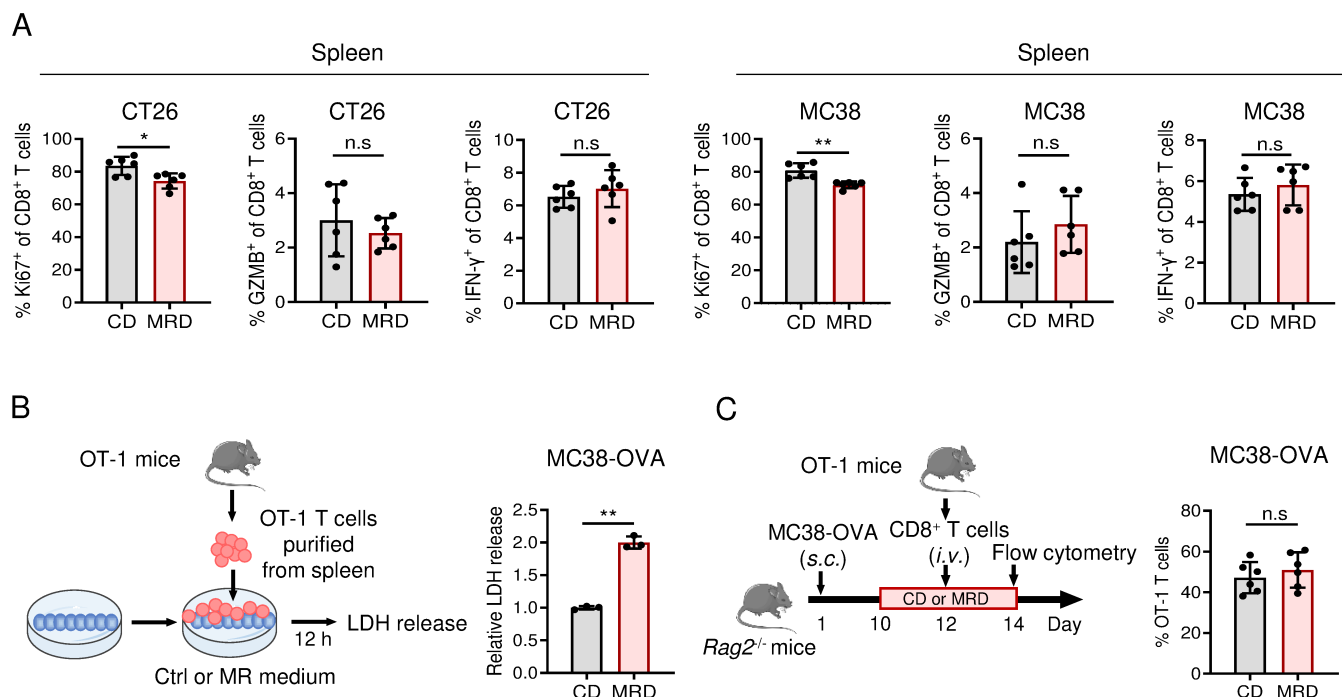

**Figure S3. The effect of methionine restriction on CD8<sup>+</sup> T cells, related to Figure 1. (A)** Flow cytometric analysis of the proportions of CD8<sup>+</sup> Ki67<sup>+</sup> T cells, CD8<sup>+</sup> GZMB<sup>+</sup> T cells and CD8<sup>+</sup> IFN-γ<sup>+</sup> T cells in spleen in subcutaneous tumor model mice implanted with CRC cells and subjected to CD or MRD feeding. (n = 6 mice per group). **(B)** Experimental design for the CD8<sup>+</sup> T cell cytotoxicity *in vitro* (left) and LDH release (right) with methionine-restricted or control medium treatment. **(C)** Experimental design for the CD8<sup>+</sup> T cell infiltration *in vivo* (left) and flow cytometric analysis of the proportions of OT-1 T cells (right) in subcutaneous tumor model mice implanted with MC38-OVA cells upon CD or MRD feeding. (n = 6 mice per group). The data in A-C are presented as the means ± SDs. *P* values were determined by two-tailed unpaired Student's *t* test (**A-C**). \**P* < 0.05; \*\**P* < 0.01; n.s., not significant.

Figure S4

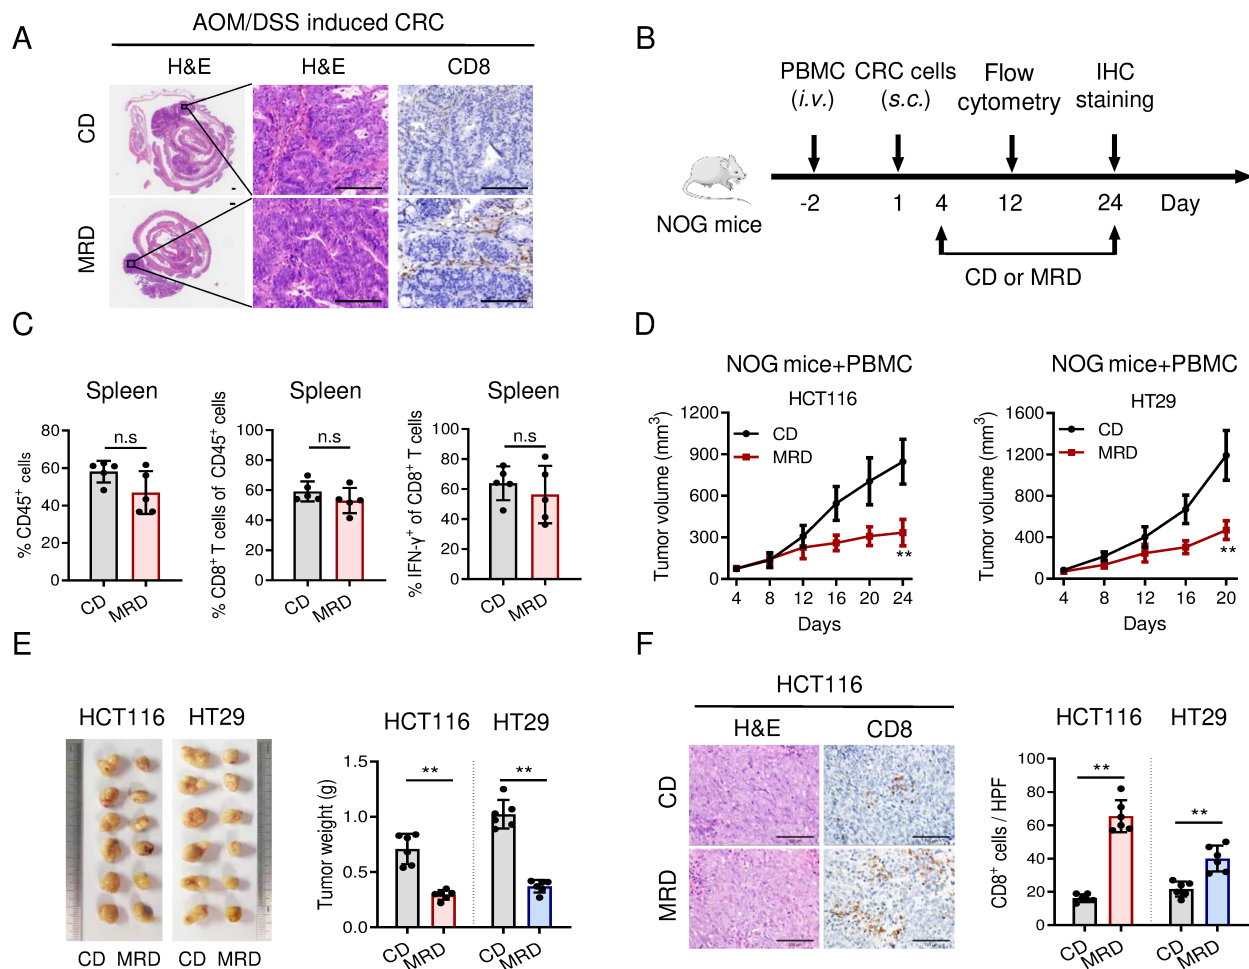

**Figure S4. Experimental design and verification of AOM-DSS and humanized mouse model, related to Figure 1.** (A) Representative images of H&E and CD8 staining in the spontaneous mouse colon cancer model with CD or MRD feeding (scale bar: 100  $\mu$ m). (B) Experimental design for the HuPBMC reconstitution mouse model. (C) Flow cytometric analysis of the proportions of spleen CD45<sup>+</sup> immune cells, CD8<sup>+</sup> T cells and CD8<sup>+</sup> IFN- $\gamma$ <sup>+</sup> T cells in the HuPBMC reconstitution mouse model with CD or MRD feeding. (n = 5 mice per group). (D-E) HuPBMC-reconstituted mouse model established in NOG mice showing the tumor growth rate (D) and tumor weight (E) after implantation of CRC cells with CD or MRD feeding. (n = 6 mice per group). (F) Representative images (left) and quantification (right) of H&E and CD8 staining in the HuPBMC-reconstituted mouse model with CD or MRD feeding. The data in C-F are presented as the means  $\pm$  SDs. The *P* value was determined by two-tailed unpaired Student's *t* test (C, E and F) and two-way ANOVA (D). \*\**P* < 0.01; n.s, not significant.

## Figure S5

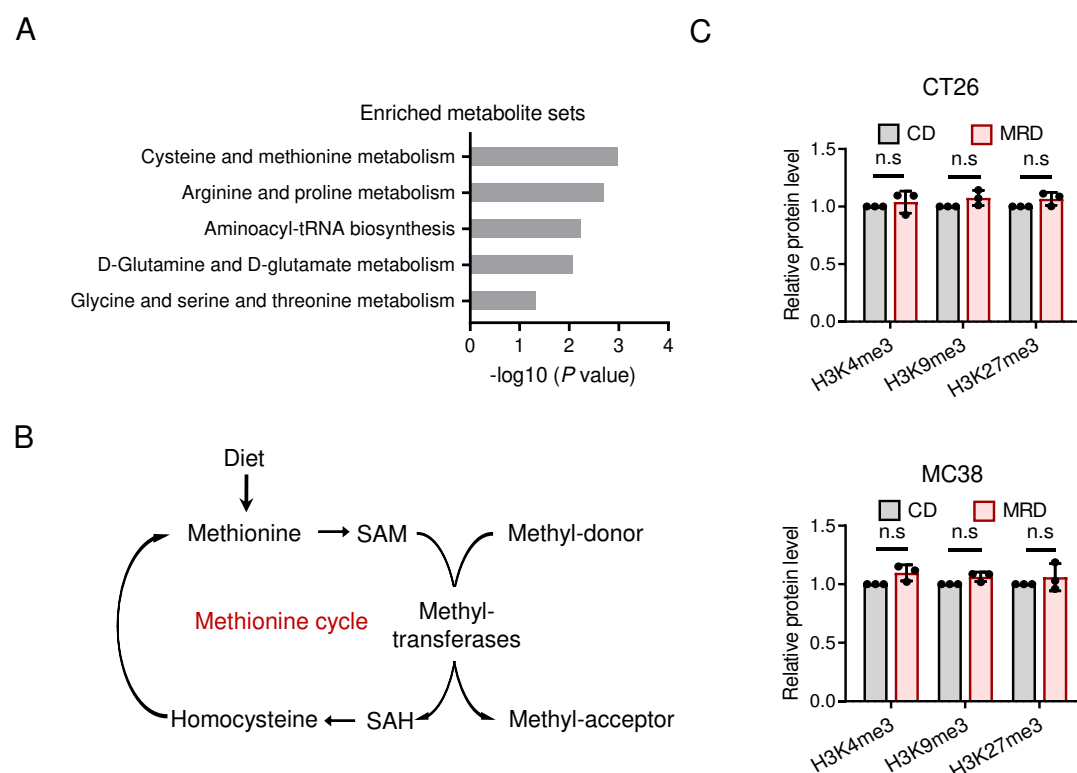

**Figure S5. Methionine is essential for methyl transfer through converting to SAM, related to Figure 1. (A)** Pathway analysis of altered metabolites in subcutaneous tumor model mice implanted with CT26 cells and subjected to CD or MRD feeding. **(B)** Schematic of methionine metabolism. **(C)** Quantification in immunoblotting of H3K4me3, H3K9me3 and H3K27me3 from subcutaneous tumors subjected to CD or MRD feeding. The data in C are presented as the means  $\pm$  SDs. *P* values were determined by two-tailed unpaired Student's *t* test (C). n.s, not significant.

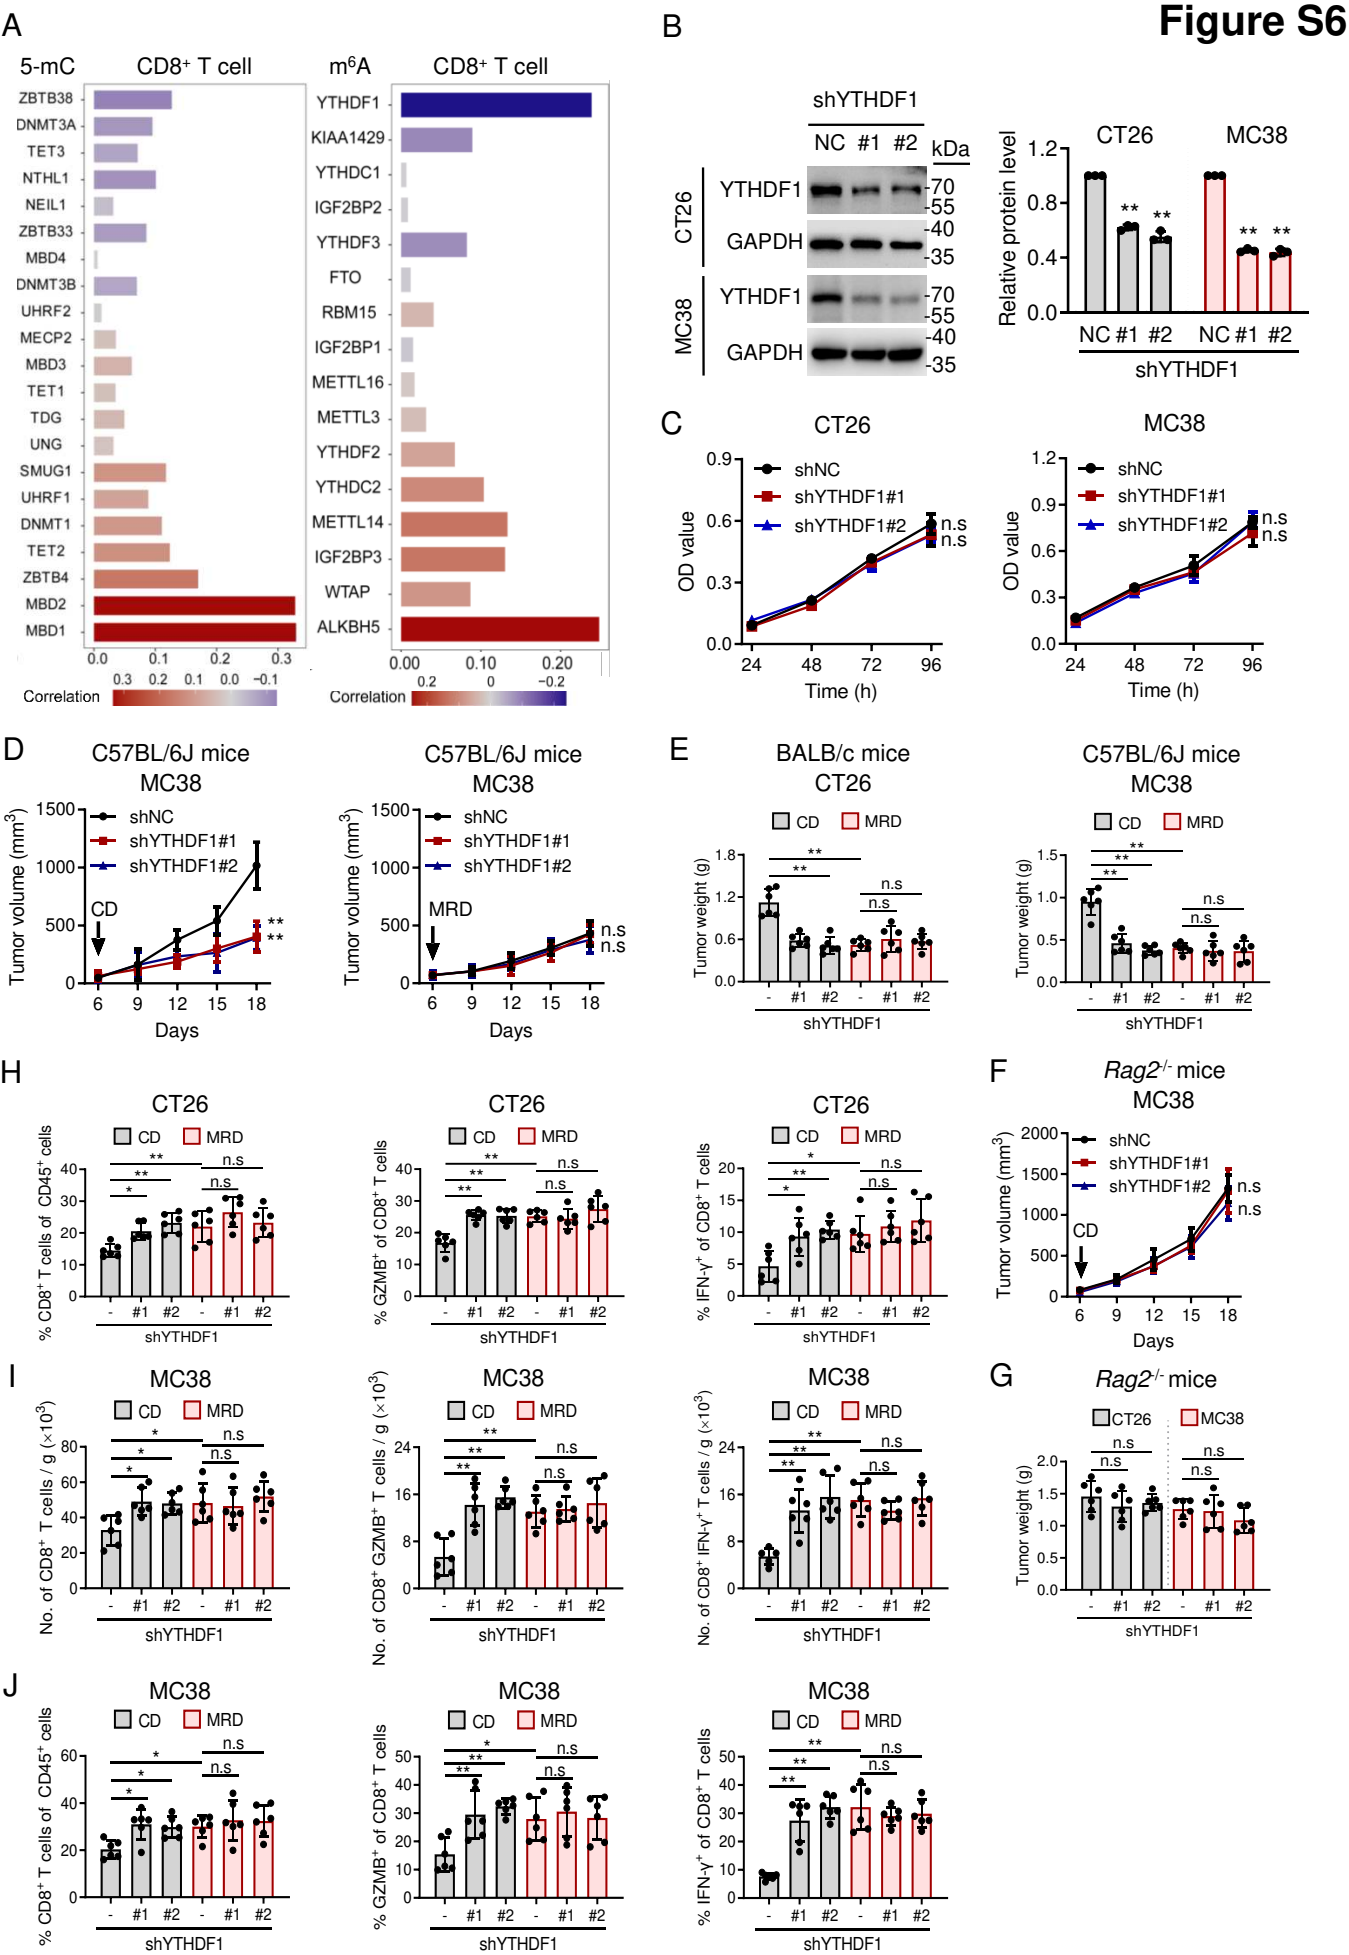



## Figure S6

**Figure S6. Methionine restriction enhances antitumor immunity via YTHDF1, related to Figure 2. (A)** Correlations of the CD8<sup>+</sup> T cell infiltration with DNA 5-mC and RNA m<sup>6</sup>A methylation regulators in CRC data from TCGA. **(B)** Immunoblotting (left) and quantification (right) of YTHDF1 in YTHDF1-knockdown cells. GAPDH was included as a loading control. **(C)** MTS assays of the cell proliferation rate of YTHDF1-knockdown and control cells. **(D)** Subcutaneous tumor models showing the tumor growth rate after implantation of YTHDF1-knockdown or control MC38 cells with CD (left) or MRD (right) feeding. (n = 6 mice per group). **(E)** Subcutaneous tumor weight after implantation of YTHDF1-knockdown or control cells with CD or MRD feeding. (n = 6 mice per group). **(F)** Subcutaneous tumor models showing the tumor growth rate after implantation of YTHDF1-knockdown or control MC38 cells in *Rag2*<sup>-/-</sup> mice. (n = 6 mice per group). **(G)** Subcutaneous tumor weight after implantation of YTHDF1-knockdown or control cells in *Rag2*<sup>-/-</sup> mice. (n = 6 mice per group). **(H)** Flow cytometric analysis of the proportions of CD8<sup>+</sup> T cells, CD8<sup>+</sup> GZMB<sup>+</sup> T cells and CD8<sup>+</sup> IFN- $\gamma$ <sup>+</sup> T cells in subcutaneous tumor model mice implanted with YTHDF1-knockdown or control CT26 cells and subjected to CD or MRD feeding. (n = 6 mice per group). **(I-J)** Flow cytometric analysis of the number (I) and proportions (J) of CD8<sup>+</sup> T cells, CD8<sup>+</sup> GZMB<sup>+</sup> T cells and CD8<sup>+</sup> IFN- $\gamma$ <sup>+</sup> T cells in subcutaneous tumor model mice implanted with MC38 cells and subjected to CD or MRD feeding. (n = 6 mice per group). The data in B-J are presented as the means  $\pm$  SDs. *P* values were determined by one-way ANOVA (**B, E and G-J**) and two-way ANOVA (**C, D and F**). \**P* < 0.05; \*\**P* < 0.01; n.s, not significant.

Figure S7

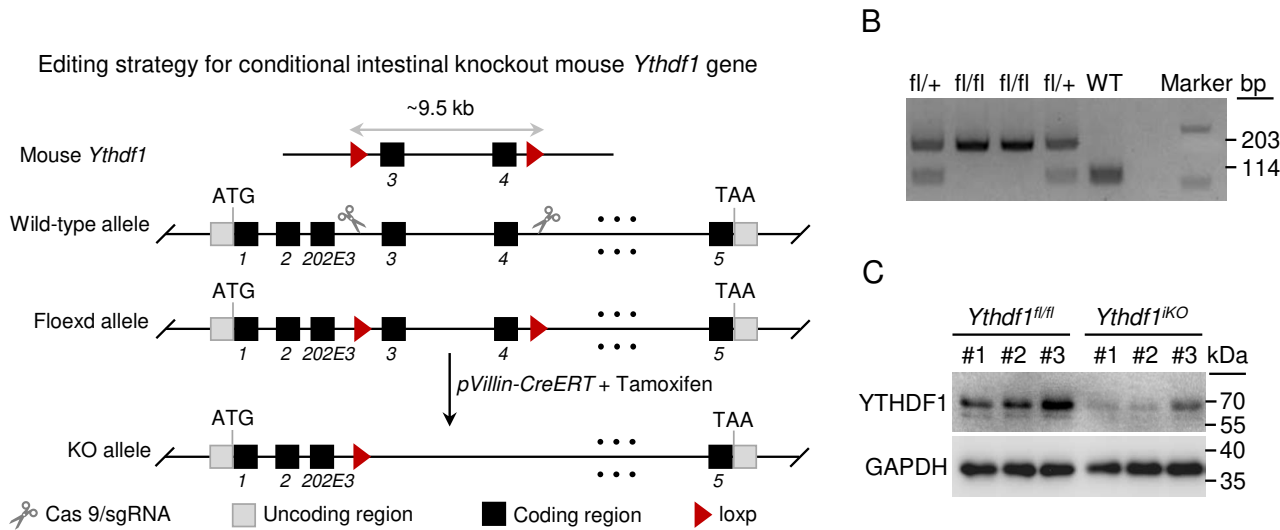

**Figure S7. Experimental design and verification of AOM-DSS-induced mouse colon cancer model established in *Ythdf1*<sup>fl/fl</sup> and *Ythdf1*<sup>iKO</sup> mice, related to Figure 2. (A)** Editing strategy for conditional intestinal knockout of the mouse *Ythdf1* gene. Transgene expressing Cre recombinase under the control of the villin gene promoter (*villin-Cre-ERT2*), an intestine-specific promoter. **(B)** PCR genotyping using mouse tail DNA. PCR screening for *Ythdf1* revealed a band of 114 bp for the wild-type allele and a band of 203 bp for the floxed allele. **(C)** Immunoblotting of YTHDF1 in spontaneous tumors from *Ythdf1*<sup>fl/fl</sup> and *Ythdf1*<sup>iKO</sup> mice after tamoxifen treatment. GAPDH was included as a loading control.

Figure S8

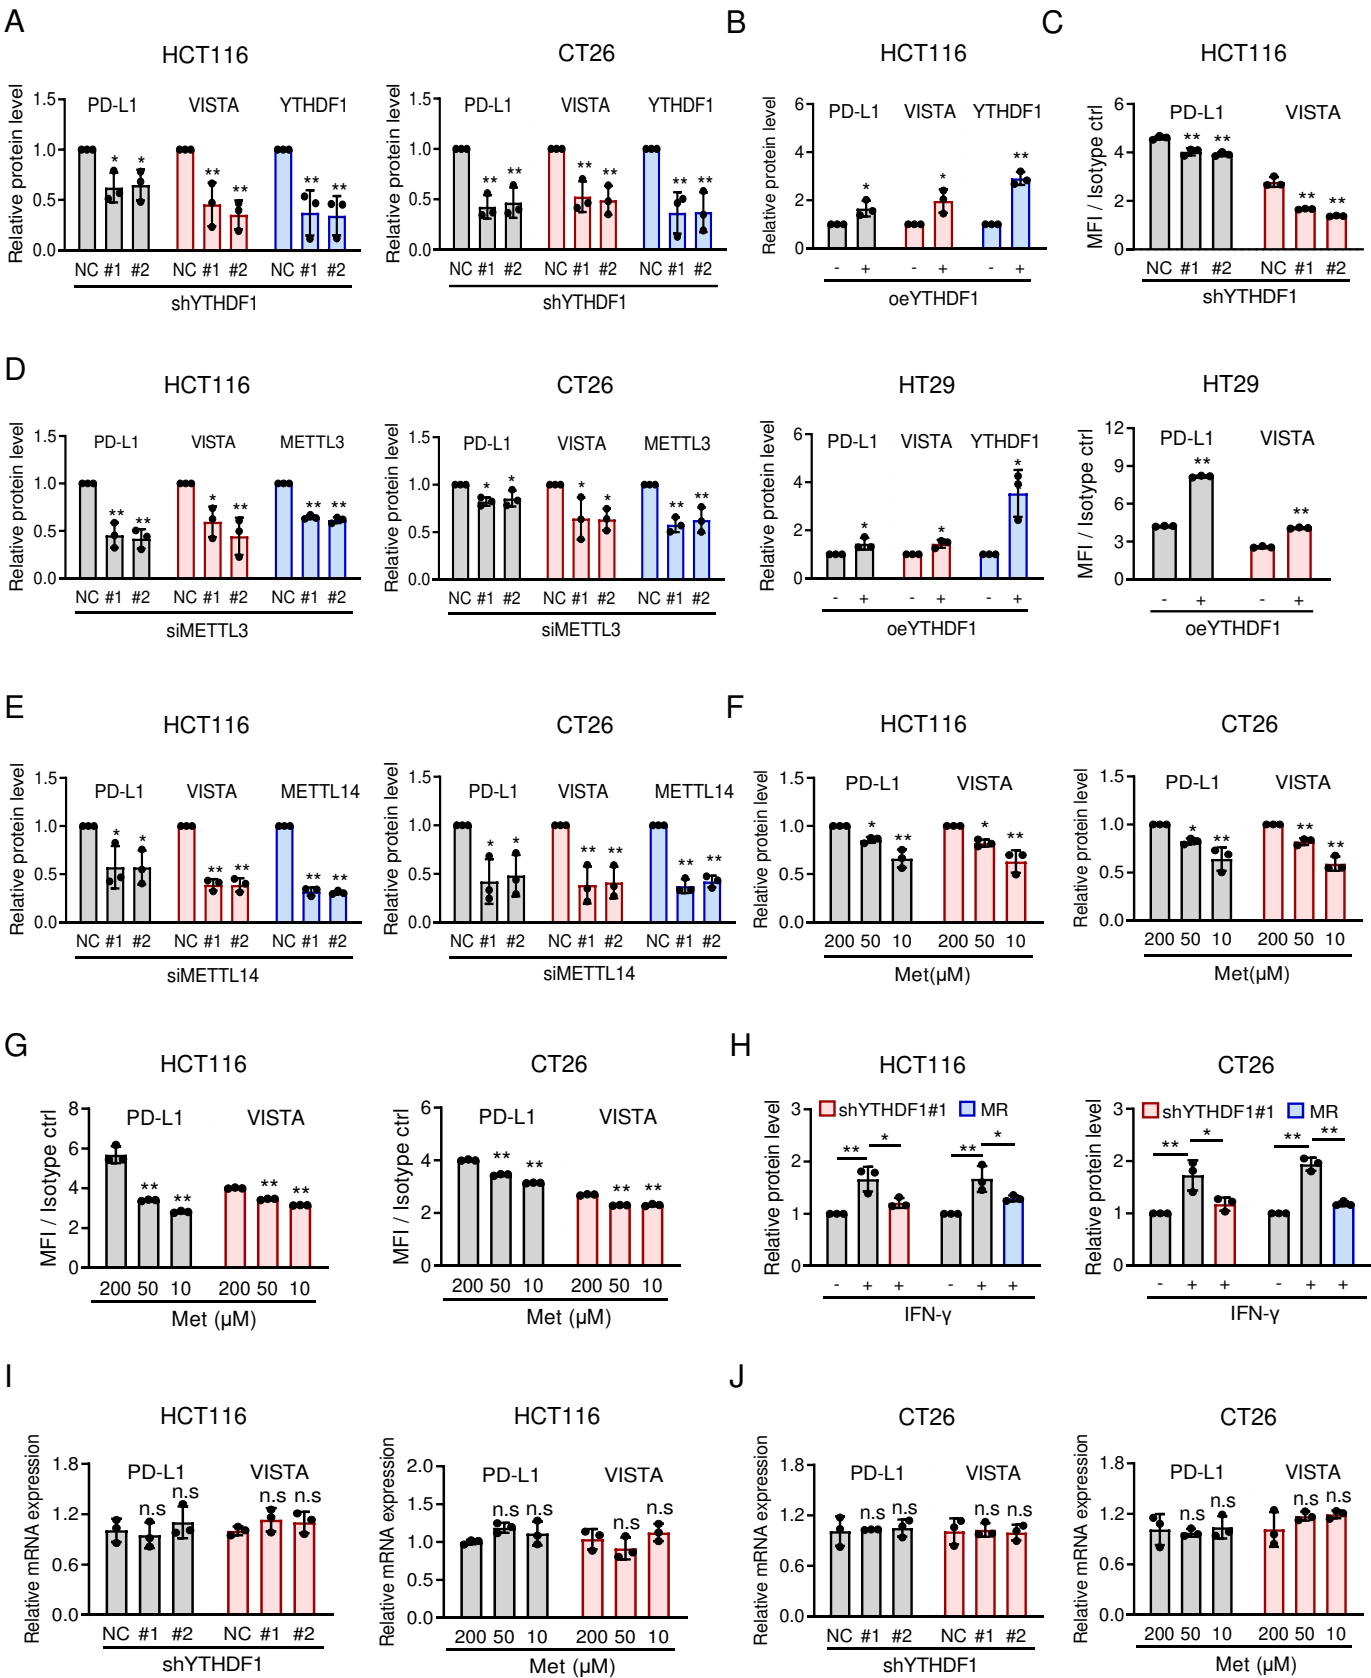

## Figure S8

**Figure S8. Methionine and YTHDF1 promote the translation of PD-L1 and VISTA, related to Figure 3.** (A-B) Quantification in immunoblotting of PD-L1, VISTA and YTHDF1 after YTHDF1 inhibition (A) or YTHDF1 overexpression (B) in CRC cells. (C) Flow cytometric analysis of PD-L1 and VISTA after YTHDF1 inhibition in HCT116 cells (up) or YTHDF1 overexpression in HT29 cells (down). MFI, mean fluorescence intensity. (D) Quantification in immunoblotting of PD-L1, VISTA and METTL3 after METTL3 inhibition in CRC cells. (E) Quantification in immunoblotting of PD-L1, VISTA and METTL14 after METTL14 inhibition in CRC cells. (F-G) Quantification in immunoblotting (F) and flow cytometric analysis (G) of PD-L1 and VISTA after methionine-restricted treatment in CRC cells. MFI, mean fluorescence intensity. (H) Quantification in immunoblotting of PD-L1 after YTHDF1 inhibition with IFN- $\gamma$  stimulation in CRC cells. (I-J) qPCR analysis of PD-L1 and VISTA expression after YTHDF1 inhibition (left) or methionine restriction (right) in HCT116 (I) and CT26 (J) cells. The data in A-J are presented as the means  $\pm$  SDs. *P* values were determined by one-way ANOVA (A, HCT116 in C and E-J) and two-tailed unpaired Student's *t* test (B and HT29 in C). \**P* < 0.05; \*\**P* < 0.01; n.s, not significant.

Figure S9

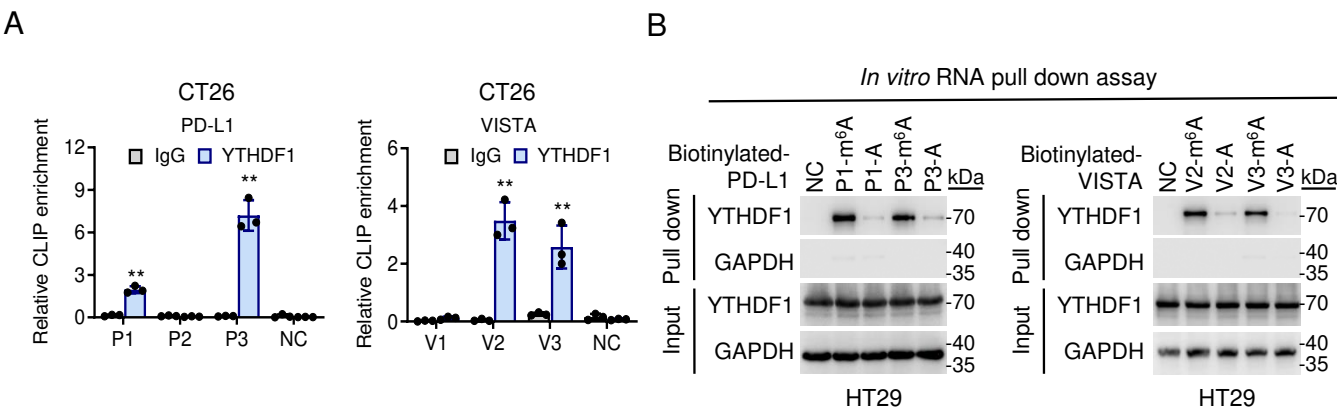

Figure S10

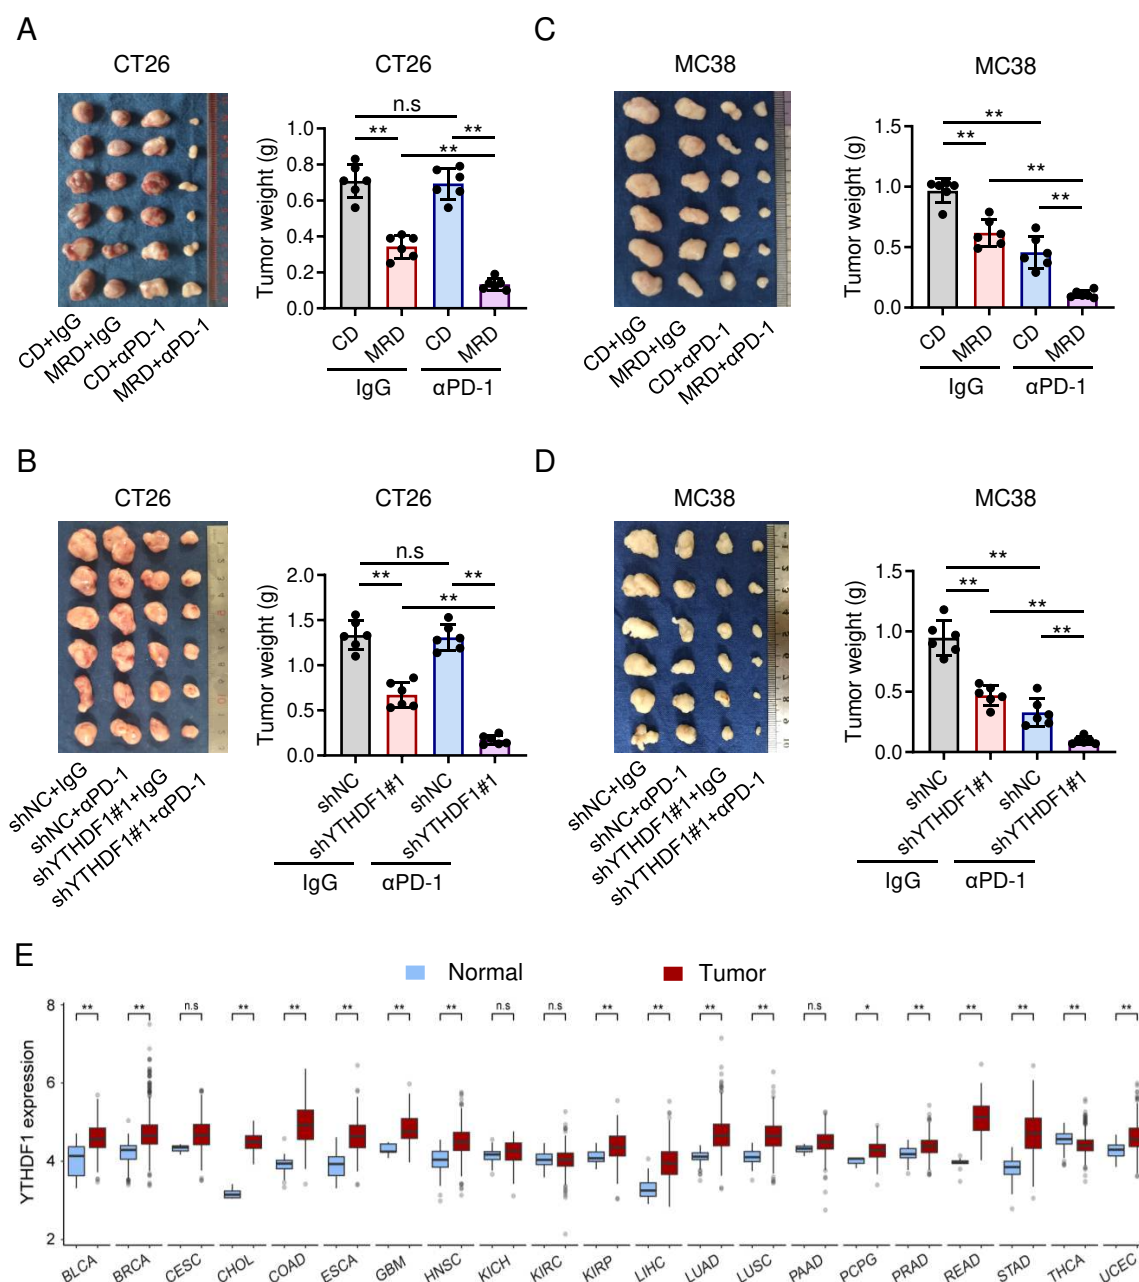**Figure S10. MRD or YTHDF1 depletion synergizes with PD-1 blockade, related to Figure 5.**

**(A)** CT26 subcutaneous tumor weight with CD or MRD feeding treated with IgG or  $\alpha$ PD-1. ( $n = 6$  mice per group). **(B)** Subcutaneous tumor weight with YTHDF1-knockdown or control CT26 cells treated with IgG or  $\alpha$ PD-1. ( $n = 6$  mice per group). **(C)** MC38 subcutaneous tumor weight with CD or MRD feeding treated with IgG or  $\alpha$ PD-1. ( $n = 6$  mice per group). **(D)** Subcutaneous tumor weight with YTHDF1-knockdown or control MC38 cells treated with IgG or  $\alpha$ PD-1. ( $n = 6$  mice per group). **(E)** Box plots of YTHDF1 expression in other TCGA cancer types. The data in A-D are presented as the means  $\pm$  SDs. The data in E are presented as a box-and-whisker graph (min-max), and the horizontal line across the box indicates the median.  $P$  values were determined one-way ANOVA (**A-D**) and two-tailed unpaired Student's  $t$  test (**E**). \* $P < 0.05$ ; \*\* $P < 0.01$ . n.s, not significant.
