# Supplementary material
Source: HighWire-hosted journal article supplement (https://gut.bmj.com/content/gutjnl-2022-326928)
Supplement: inline-supplementary-material-3 [file inline-supplementary-material-3.pdf]

## Supplemental Tables

**Tables S1a: Correlation analysis for clinicopathologic variables in YTHDF1 expression among 383 colorectal cancer patients**

| Variable                  | YTHDF1 expression |                   | <i>P</i> * |
|---------------------------|-------------------|-------------------|------------|
|                           | Low, 202 (52.7%)  | High, 181 (47.3%) |            |
| Age, years                |                   |                   | .752       |
| ≤ 60                      | 125 (32.6)        | 115 (30.1)        |            |
| > 60                      | 77 (20.1)         | 66 (17.2)         |            |
| Gender                    |                   |                   | .917       |
| Male                      | 121 (31.6)        | 107 (27.9)        |            |
| Female                    | 81 (21.1)         | 74 (19.3)         |            |
| Clinical stage            |                   |                   | .001       |
| I, II                     | 95 (24.8)         | 53 (13.8)         |            |
| III, IV                   | 107 (27.8)        | 128 (33.4)        |            |
| Degree of differentiation |                   |                   | .163       |
| Well/moderate             | 175 (45.7)        | 147 (38.4)        |            |
| Poor                      | 27 (7.0)          | 34 (8.9)          |            |
| Tumor depth               |                   |                   | .021       |
| m/sm/mp                   | 25 (6.5)          | 10 (2.6)          |            |
| ss/se/si                  | 177 (46.2)        | 171 (44.6)        |            |
| Vascular invasion         |                   |                   | .011       |
| Absent                    | 166 (43.3)        | 128 (33.4)        |            |
| Present                   | 36 (9.4)          | 53 (13.8)         |            |
| Perineural invasion       |                   |                   | .123       |
| Absent                    | 121 (31.6)        | 94 (24.5)         |            |
| Present                   | 81 (21.1)         | 87 (22.7)         |            |

\**P* values determined by Chi-square test using SPSS 20.0. All statistical tests were two-sided. m: tumor invasion of mucosa; sm: submucosa; mp: muscularis propria; ss: subserosa; se: serosa penetration; si: invasion to adjacent structures.

**Table S1b: Univariate and multivariate analyses of prognostic factors for overall survival among 383 colorectal cancer patients.**

| Factors                                     | Univariate*          |            | Multivariate*, †, ‡  |            |
|---------------------------------------------|----------------------|------------|----------------------|------------|
|                                             | HR (95% CI)          | <i>P</i> * | HR (95% CI)          | <i>P</i> * |
| Age (≤60/>60)                               | 1.650 (1.103-2.469)  | .015       | 1.870 (1.244-2.811)  | .003       |
| Gender (male/female)                        | 0.605 (0.391-0.936)  | .025       | /                    | /          |
| TNM stage<br>(I-II/III-IV)                  | 3.487 (2.061-5.900)  | <.001      | 2.080 (1.186-3.650)  | .011       |
| Histological grade<br>(well, moderate/poor) | 1.774 (1.101-2.857)  | .019       | /                    | /          |
| Tumor depth<br>(m, sm, mp/ss, se, si)       | 1.373 (0.636-2.965)  | .420       | /                    | /          |
| Vascular invasion<br>(absent/present)       | 3.265 (2.171-4.910)  | <.001      | 2.192 (1.421-3.382)  | <.001      |
| Perineural invasion<br>(absent/present)     | 2.185 (1.449-3.297)  | <.001      | 1.714 (1.123-2.619)  | 0.013      |
| YTHDF1 Expression<br>(low/high)             | 6.431 (3.862-10.711) | <.001      | 6.420 (3.819-10.792) | <.001      |

\* Hazard ratios and *P* values were obtained from Cox proportional hazards regression. All statistical tests were two-sided. † For the multivariate model, HR and *P* values were shown for the final set of stepwise selected variables only. ‡ The parameters with *P* value less than .05 in the univariate were included in the multivariate Cox analysis using SPSS 20.0. CRC: Colorectal cancer; m: tumor invasion of mucosa; sm: submucosa; mp: muscularis propria; ss: subserosa; se: serosa penetration; si: invasion to adjacent structures. HR: hazard ratio; CI: confidence interval.

**Table S2. Antibodies used in this study.**

| Antibodies       | Dilution                                      | Company/Catalog           |
|------------------|-----------------------------------------------|---------------------------|
| YTHDF1           | WB (1:1000)                                   | LSBio, LS-C660672         |
|                  | IHC (1:250)                                   | LSBio, LS-C660672         |
|                  | RIP (5 µg/assay)                              | LSBio, LS-C660672         |
| m <sup>6</sup> A | Dot blot (1:500)                              | Abcam, ab151230           |
|                  | MeRIP (5 µg/assay)                            | SYSY, 202003              |
| 5-mC             | Dot blot (1:1000)                             | CST, 28692S               |
| H3               | WB (1:2000)                                   | CST, 4499T                |
| H3K4me3          | WB (1:1000)                                   | CST, 9751T                |
| H3K9me3          | WB (1:1000)                                   | CST, 13969T               |
| H3K27me3         | WB (1:1000)                                   | CST, 9733T                |
| CD8 human        | IHC (1:500)                                   | Abcam, ab 178089          |
|                  | FCM (5 µL/10 <sup>6</sup> cells in 100 µL)    | Biolegend, 344721         |
| CD8 mouse        | IHC (1:500)                                   | Abcam, ab217344           |
|                  | FCM (2 µL/10 <sup>6</sup> cells in 100 µL)    | Biolegend, 100744         |
| PD-L1 human      | WB (1:1000)                                   | Abcam, ab213524           |
|                  | FCM (5 µL/10 <sup>6</sup> cells in 100 µL)    | Biolegend, 329707         |
| PD-L1 mouse      | WB (1:1000)                                   | Abcam, ab213480           |
|                  | FCM (1 µL/10 <sup>6</sup> cells in 100 µL)    | Biolegend, 124311         |
| VISTA human      | WB (1:1000)                                   | CST, 64953                |
|                  | FCM (5 µL/10 <sup>6</sup> cells in 100 µL)    | Thermo Fisher, 17-1088-41 |
| VISTA mouse      | WB (1:1000)                                   | CST, 54979                |
|                  | FCM (5 µL/10 <sup>6</sup> cells in 100 µL)    | Biolegend, 143709         |
| METTL3           | WB (1:1000)                                   | Abcam, ab195352           |
| METTL14          | WB (1:1000)                                   | Abcam, ab252562           |
| GAPDH            | WB (1:20000)                                  | Proteintech, 60004-1-Ig   |
| CD3 human        | FCM (5 µL/10 <sup>6</sup> cells in 100 µL)    | Biolegend, 300430         |
| CD3 mouse        | FCM (1 µL/10 <sup>6</sup> cells in 100 µL)    | Biolegend, 109249         |
| CD45 human       | FCM (5 µL/10 <sup>6</sup> cells in 100 µL)    | Biolegend, 304007         |
| CD45 mouse       | FCM (1 µL/10 <sup>6</sup> cells in 100 µL)    | Biolegend, 103132         |
| Zombie Aqua      | FCM (1:500)                                   | Biolegend, 423102         |
| IFN-γ human      | FCM (5 µL /10 <sup>6</sup> cells in 100 µL)   | Biolegend, 502531         |
| IFN-γ mouse      | FCM (0.5 µL /10 <sup>6</sup> cells in 100 µL) | Biolegend, 505830         |
| GZMB             | FCM (5 µL/10 <sup>6</sup> cells in 100 µL)    | Biolegend, 372208         |
| Ki67 mouse       | FCM (1 µL/10 <sup>6</sup> cells in 100 µL)    | Biolegend, 652406         |

**Table S3. List of oligonucleotides and primers used in this study.**

| <b>RIP qPCR primers for YTHDF1 target genes</b>  |                                 |
|--------------------------------------------------|---------------------------------|
| PD-L1 human forward                              | 5'-TGGCATTGCTGAACGCATTT-3'      |
| PD-L1 human reverse                              | 5'-TGCAGCCAGGTCTAATTGTTTT-3'    |
| VISTA human forward                              | 5'-ACGCCGTATTCCCTGTATGTC-3'     |
| VISTA human reverse                              | 5'-TTGTAGAAGGTCACATCGTGC-3'     |
| EGFR human forward                               | 5'-AGGCACGAGTAACAAGCTCAC-3'     |
| EGFR human reverse                               | 5'-ATGAGGACATAACCAGCCACC-3'     |
| MDM2 human forward                               | 5'-GAGCTTGGCTGCTTCTGGG-3'       |
| MDM2 human reverse                               | 5'- AAAGCAGCAGGATCTCGGTC -3'    |
| PVR human forward                                | 5'- CACTCAGGCATGTCCCGTAA -3'    |
| PVR human reverse                                | 5'- AGGCACACTGGAAGGACTCA -3'    |
| NFE2L2 human forward                             | 5'- TCAGCGACGGAAAGAGTATGA -3'   |
| NFE2L2 human reverse                             | 5'- CCACTGGTTTCTGACTGGATGT -3'  |
| GAPDH human forward                              | 5'- GGAGCGAGATCCCTCCAAAAT -3'   |
| GAPDH human reverse                              | 5'- GGCTGTTGTCATACTTCTCATGG -3' |
| PD-L1 mouse forward                              | 5'- GACGCAGGCGTTTACTGCT -3'     |
| PD-L1 mouse reverse                              | 5'- GCGGTATGGGGCATTGACTTT -3'   |
| VISTA mouse forward                              | 5'- GTTGGTGAGGATGGACAGCA -3'    |
| VISTA mouse reverse                              | 5'- GGGAGTCAGGGAAGTGGATCT -3'   |
| EGFR mouse forward                               | 5'- GCCATCTGGGCCAAAGATAACC -3'  |
| EGFR mouse reverse                               | 5'- GTCTTCGCATGAATAGGCCAAT -3'  |
| MDM2 mouse forward                               | 5'- CCGTGAAGGGTCGGAAGAT -3'     |
| MDM2 mouse reverse                               | 5'- GCACCCTCGGTAGACACAGA -3'    |
| PVR mouse forward                                | 5'- ATTGCCACATTCCCCAGAGG -3'    |
| PVR mouse reverse                                | 5'- GTCCAGGAGGGTGACCATTG -3'    |
| NFE2L2 mouse forward                             | 5'- TAGATGACCATGAGTCGCTTGC -3'  |
| NFE2L2 mouse reverse                             | 5'- GCCAAACTTGCTCCATGTCC -3'    |
| GAPDH mouse forward                              | 5'- AGGTCGGTGTGAACGGATTTG -3'   |
| GAPDH mouse reverse                              | 5'- AGGTCGGTGTGAACGGATTTG -3'   |
| <b>CLIP qPCR primers for YTHDF1 target genes</b> |                                 |
| PD-L1-P1 forward                                 | 5'- GGTTGTGGATCCAGTCACCT -3'    |
| PD-L1-P1 reverse                                 | 5'- TCCAGATGACTTCGGCCTTG -3'    |
| PD-L1-P2 forward                                 | 5'- CCTCTGGCACATCCTCCAAAT -3'   |
| PD-L1-P2 reverse                                 | 5'- ACGGAAGATGAATGTCAGTGCT -3'  |

|                                  |                                                                                                         |
|----------------------------------|---------------------------------------------------------------------------------------------------------|
| PD-L1-P3 forward                 | 5'- TGAGCGTGACAAGAGGAAGG -3'                                                                            |
| PD-L1-P3 reverse                 | 5'- GAGCCCCTCAGGCATTTGAA -3'                                                                            |
| VISTA-V1 forward                 | 5'- TGGATGCTACATGGGGATGC -3'                                                                            |
| VISTA-V1 reverse                 | 5'- TGTCTCAGAACGAGAGCTGC -3'                                                                            |
| VISTA-V2 forward                 | 5'- AGACATGAGCCTTGGGATGTG -3'                                                                           |
| VISTA-V2 reverse                 | 5'- AGAAGTCTCTCCACCGTGCC -3'                                                                            |
| VISTA-V3 forward                 | 5'- CTTGGGCAATCTGAGGCCAG -3'                                                                            |
| VISTA-V3 reverse                 | 5'- AGCATCCCGCTTCATACTCAG -3'                                                                           |
| <b>Sequences of siRNAs/shRNA</b> |                                                                                                         |
| METTL3 human #1                  | 5'- GCACTTGGATCTACGGAAT -3'                                                                             |
| METTL3 human #2                  | 5'- CGACTACAGTAGCTGCCTT -3'                                                                             |
| METTL14 human #1                 | 5'- CAACTACAATGCAGAAACA -3'                                                                             |
| METTL14 human #2                 | 5'- GAAGACGCCTTCATCTATT -3'                                                                             |
| YTHDF1 human #1                  | 5'- CCTACGGACAGCTCAGTAA -3'                                                                             |
| YTHDF1 human #2                  | 5'- CCTGCTCTTCAGCGTCAAT -3'                                                                             |
| METTL3 mouse #1                  | 5'- CAAGGAAGAGTGCATGAAA -3'                                                                             |
| METTL3 mouse #2                  | 5'- GAAAGGTCTTGGAGAGGTA -3'                                                                             |
| METTL14 mouse #1                 | 5'- GCATTGGTGCTGTGTTAAA -3'                                                                             |
| METTL14 mouse #2                 | 5'- TTGAAGAATACCCTAAACT -3'                                                                             |
| YTHDF1 mouse #1                  | 5'- GCACTGACTGGTGTCTTTT -3'                                                                             |
| YTHDF1 mouse #2                  | 5'- GCACACAACCTCTATCTTT -3'                                                                             |
| <b>RNA probe sequence</b>        |                                                                                                         |
| PD-L1                            | P1-m <sup>6</sup> A 5'biotin-CCUCUG <b>A(m<sup>6</sup>A)</b> CAUG <b>A(m<sup>6</sup>A)</b> CUGACAU-3'   |
|                                  | P1-A 5'biotin-CCUCUG <b>A</b> CAUG <b>A</b> CUGACAU-3'                                                  |
|                                  | P1-T 5'biotin-CCUCUG <b>T</b> CAUG <b>T</b> CUGACAU-3'                                                  |
|                                  | P3-m <sup>6</sup> A 5'biotin-GCAAUGUGGG <b>A(m<sup>6</sup>A)</b> CUUAAAAGGC-3'                          |
|                                  | P3-A 5'biotin-GCAAUGUGGG <b>A</b> CUUAAAAGGC-3'                                                         |
|                                  | P3-T 5'biotin-GCAAUGUGGG <b>T</b> CUUAAAAGGC-3'                                                         |
| VISTA                            | V2-m <sup>6</sup> A 5'biotin-GUGGG <b>A(m<sup>6</sup>A)</b> CAAGAUGG <b>A(m<sup>6</sup>A)</b> CACUGG-3' |
|                                  | V2--A 5'biotin-GUGGG <b>A</b> CAAGAUGG <b>A</b> CACUGG-3'                                               |
|                                  | V2--T 5'biotin-GUGGG <b>T</b> CAAGAUGG <b>T</b> CACUGG-3'                                               |
|                                  | V3-m <sup>6</sup> A 5'biotin-CACCCUGGG <b>A(m<sup>6</sup>A)</b> CACUUCUGAG-3'                           |
|                                  | V3-A 5'biotin-CACCCUGGG <b>A</b> CACUUCUGAG-3'                                                          |
|                                  | V3-T 5'biotin-CACCCUGGG <b>T</b> CACUUCUGAG-3'                                                          |
